# Supplementary material for: Anti-cancer activity of camptothecin nanocrystals decorated by silver nanoparticles
Source: Royal Society of Chemistry journal article supplement (doi:10.1039/c7tb00134g), 2017-01-01
Supplement: c7tb00134g1.pdf [file c7tb00134g1.pdf]

## Supporting Information

### Anti-Cancer Activity of Camptothecin Nanocrystals Decorated by Silver Nanoparticles

*Honglei Zhan, Xiaqing Zhou, Yang Cao, Tina Jagtiani, Tzu-Lan Chang, Jun F. Liang\**

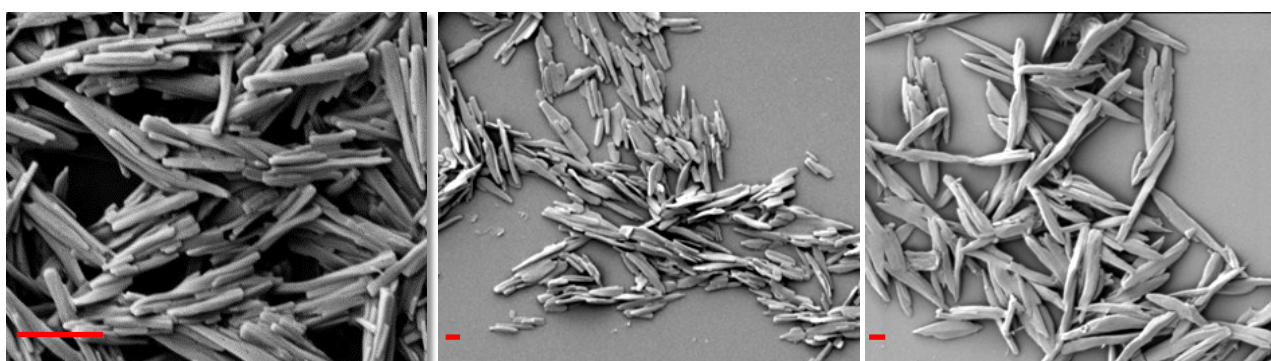

**Figure S1** SEM images of naked CPT nanocrystals with different preparation time: 3 h (Left), 24 h (Middle) and 48 h (Right). Scale bar = 100 nm.

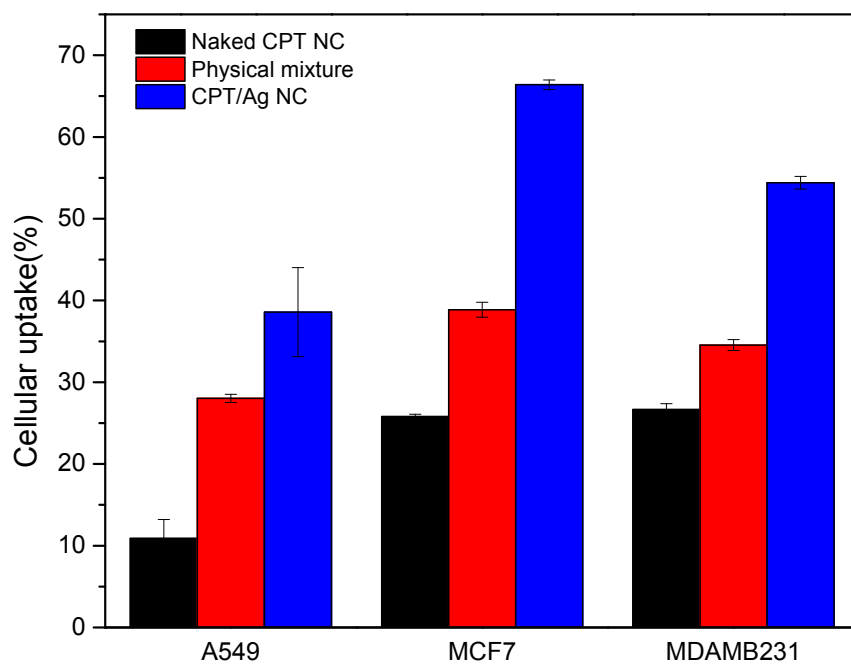

**Figure S2** Cellular uptake of CPT/Ag nanocrystals in comparison with naked CPT nanocrystals and physical mixture of PDA coated CPT nanocrystals and AgNPs in A549, MCF7 and MDAMB231 cells when drug-cell interaction time was 1 h at 37°C(n=3).
